# Supplementary material
Source: PubMed Central journal article supplement (PMC6927499)
Supplement: ehp-127-117006-s003.pdf [file ehp-127-117006-s003.pdf]

**Note to readers with disabilities:** *EHP* strives to ensure that all journal content is accessible to all readers. However, some figures and Supplemental Material published in *EHP* articles may not conform to [508 standards](#) due to the complexity of the information being presented. If you need assistance accessing journal content, please contact [ehp508@niehs.nih.gov](mailto:ehp508@niehs.nih.gov). Our staff will work with you to assess and meet your accessibility needs within 3 working days.

### **Supplemental Material**

#### **Global Transcriptional Analysis of Nontransformed Human Intestinal Epithelial Cells (FHs 74 Int) after Exposure to Selected Drinking Water Disinfection By-Products**

Erik Procházka, Steven D. Melvin, Beate I. Escher, Michael J. Plewa, and Frederic D.L. Leusch

#### **Table of Contents**

##### **Additional File- Excel Documents**

1. Normalised\_microarray\_data.xlsx
2. MetaCore\_Output\_Microarray\_DEGs.xls
